# Supplementary material
Source: ML conference proceedings conference paper supplement (https://proceedings.mlr.press/v151/le22a.html)

Objective Values

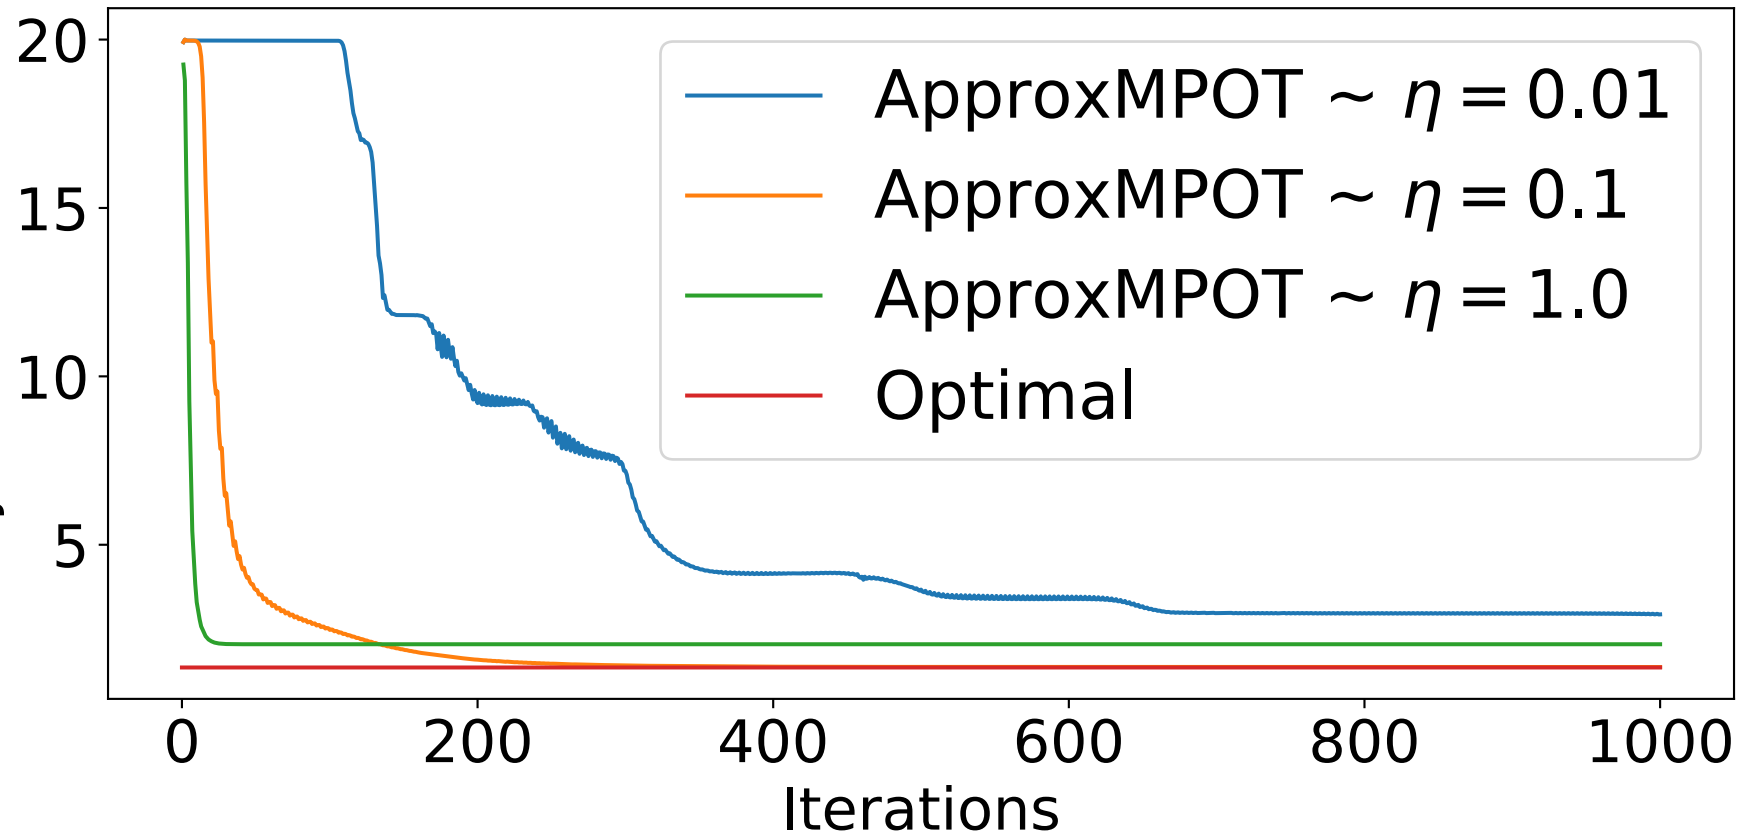

Supplement: Supplementary file 2 [file le22a-supp.zip]

Distributions

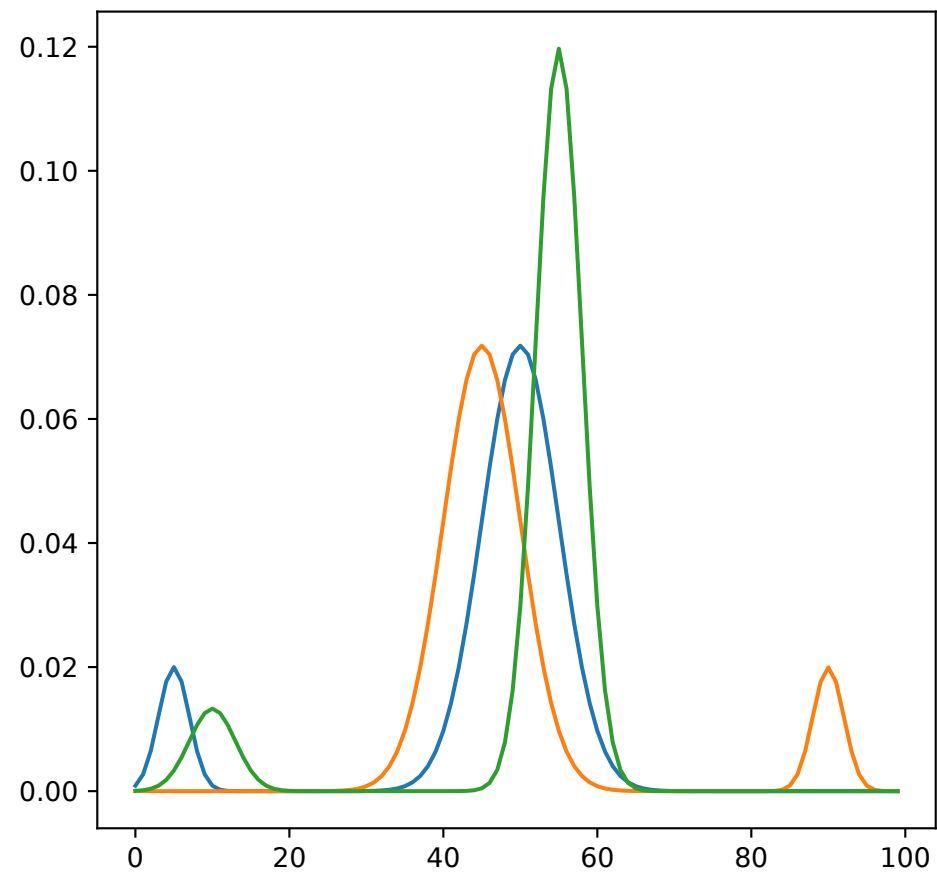

Barycenters

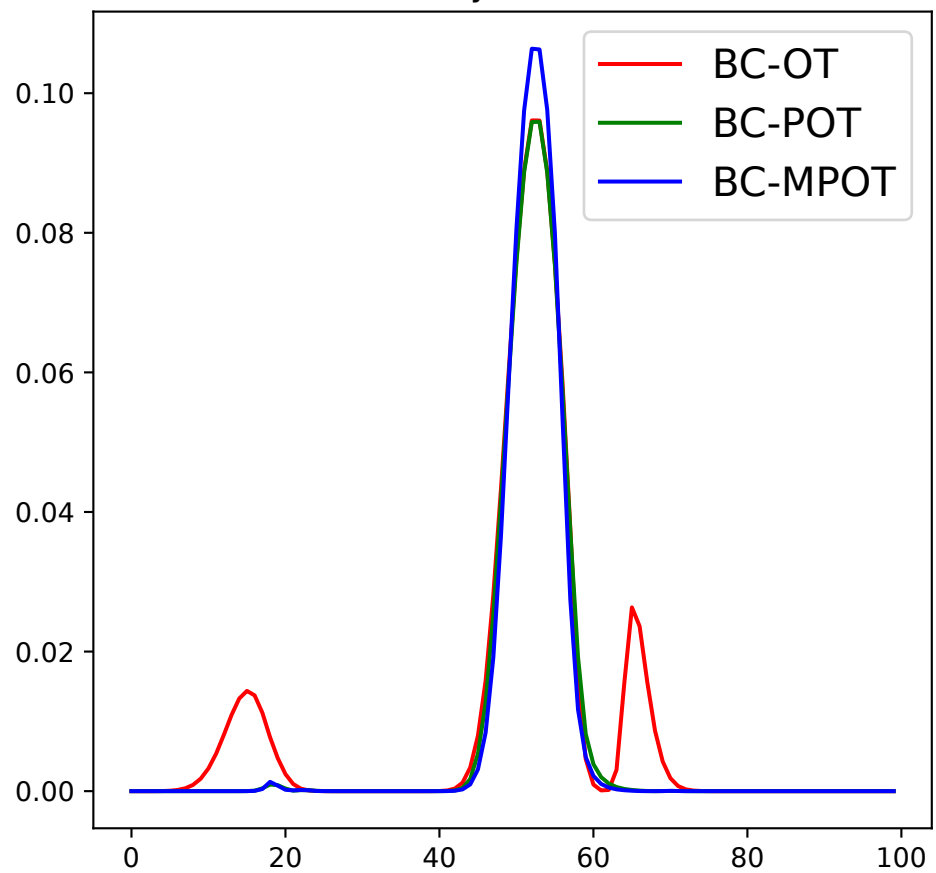

Supplement: Supplementary file 3 [file le22a-supp.zip]
